# Supplementary material for: Efficient photoelectrochemical water oxidation over cobalt-phosphate (Co-Pi) catalyst modified BiVO4/1D-WO3 heterojunction electrodes
Source: Royal Society of Chemistry journal article supplement (doi:10.1039/c3cp52401a), 2013-01-01
Supplement: c3cp52401a.pdf [file c3cp52401a.pdf]

## Supplementary Figures

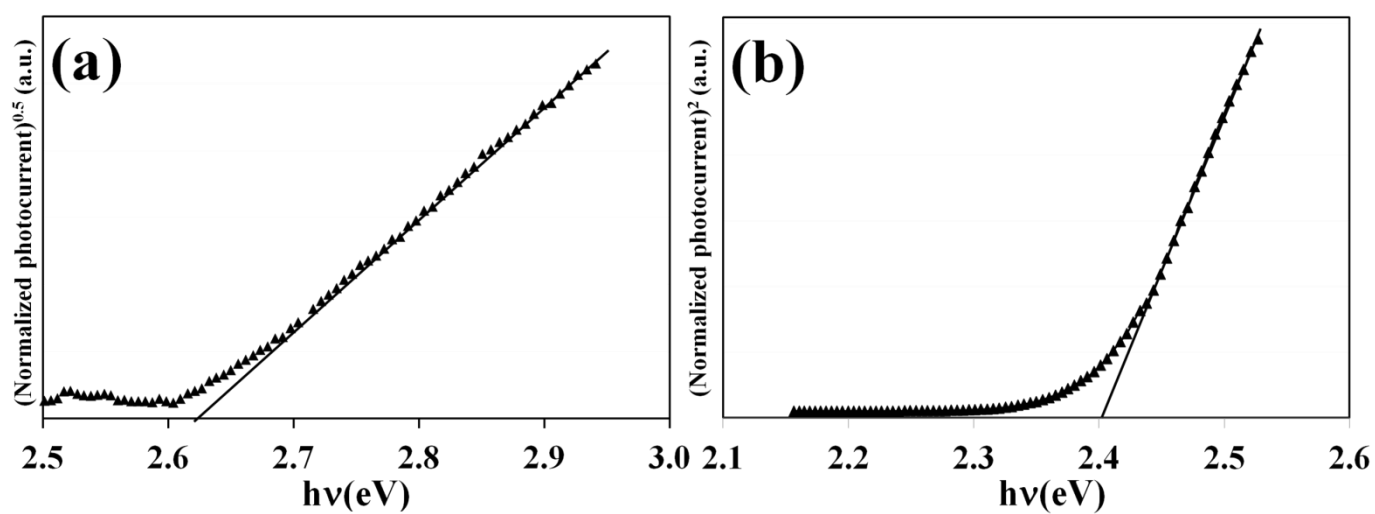

**Fig. S1** Photocurrent action spectra of (a) 1D-WO<sub>3</sub>/FTO and (b) BiVO<sub>4</sub>/FTO electrodes measured in 1 mM Na<sub>2</sub>SO<sub>3</sub> aqueous solution (pH7 phosphate buffered), applied bias 0.7 V vs. Ag/AgCl.

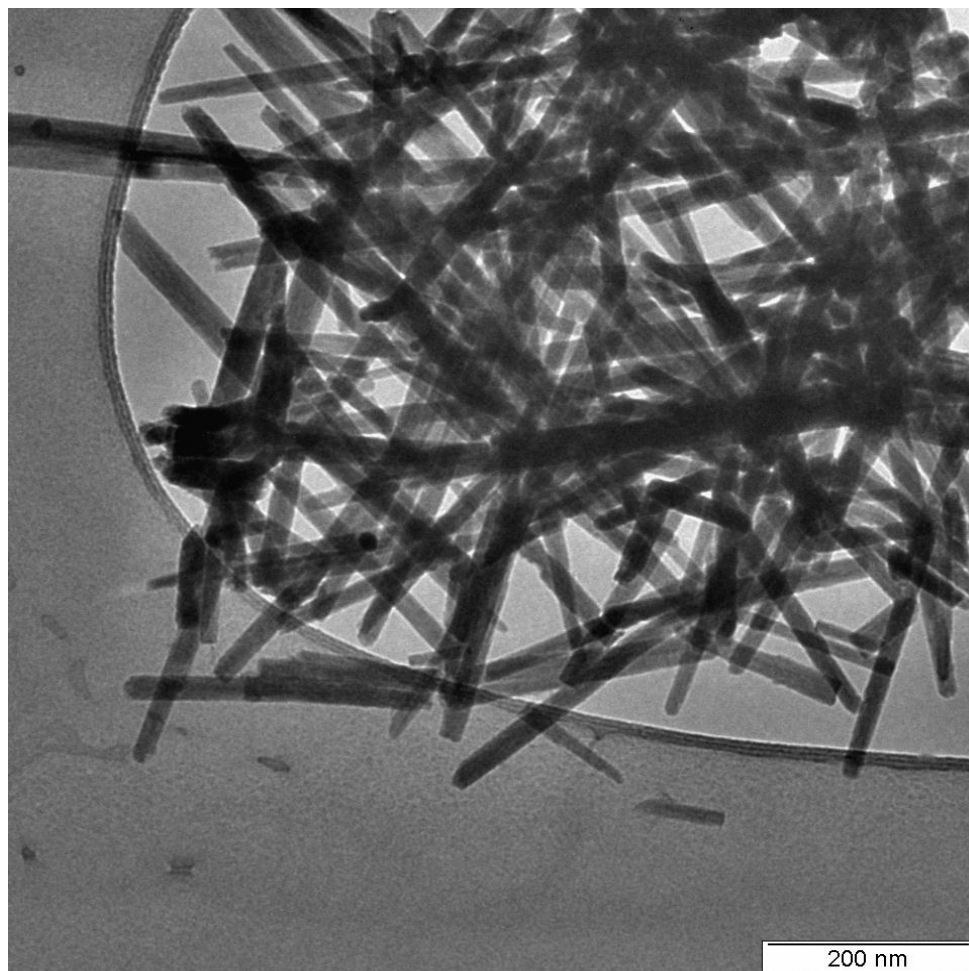

**Fig. S2** TEM images of 1D-WO<sub>3</sub> prepared using ((C<sub>4</sub>H<sub>9</sub>)<sub>4</sub>N)<sub>4</sub>W<sub>10</sub>O<sub>39</sub> precursor.

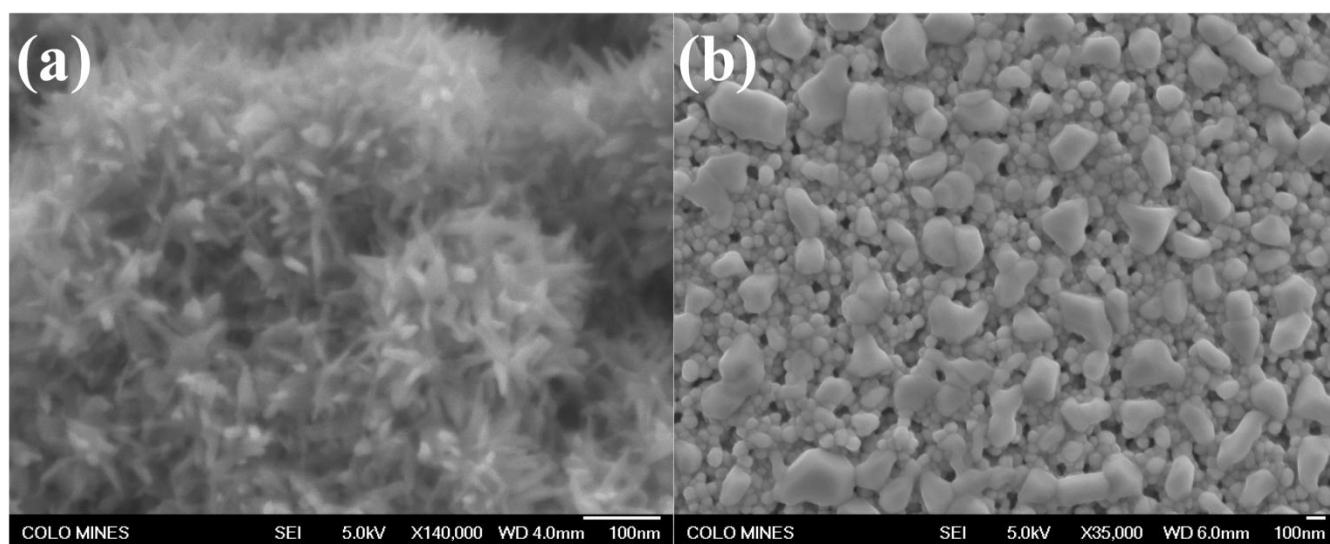

**Fig. S3** SEM Images of (a) 1D-WO<sub>3</sub>/FTO and (b) BiVO<sub>4</sub>/FTO electrodes.

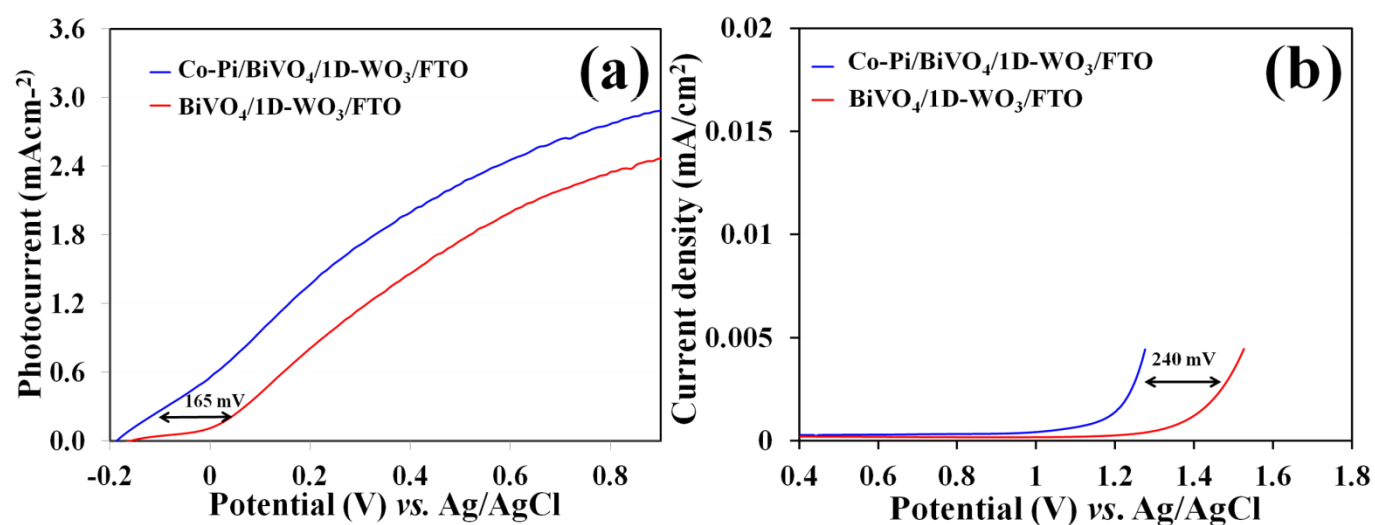

**Fig. S4** Linear sweep voltammograms of Co-Pi/BiVO<sub>4</sub>/1D-WO<sub>3</sub>/FTO electrodes (blue) and BiVO<sub>4</sub>/1D-WO<sub>3</sub>/FTO electrodes (red) in 0.5M Na<sub>2</sub>SO<sub>4</sub> electrolytes measured (scan rate, 25 mV/s) under (AM1.5 (100 mW/cm<sup>2</sup>) light (a) and dark (b).

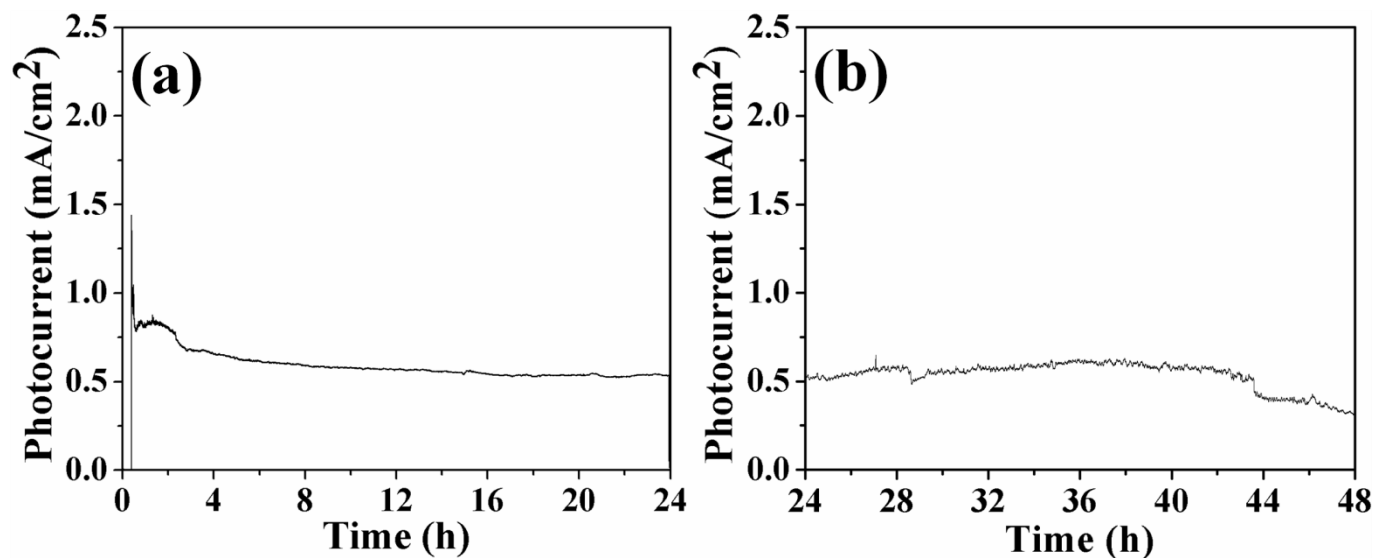

**Fig. S5** The photocurrent vs. time (chronoamperometry) plots of Co-Pi/1D-WO<sub>3</sub>/BiVO<sub>4</sub>/FTO photoanode (a) till 24 h and (b) extended durability measurements till 48 h, measured at an applied bias of 0.63 V vs. Pt counter electrode in 0.5M Na<sub>2</sub>SO<sub>4</sub>. The measurements were performed under continuous 1 sun, AM 1.5 simulated solar irradiation for 24 h.
